# Supplementary material for: Cumulative Live-Birth Rates after In Vitro Fertilization
Source: Atypon-hosted journal article supplement (doi:10.1056/nejmoa0803072), 2009-01-14
Supplement: nejm_malizia_236sa1.pdf [file nejm_malizia_236sa1.pdf]

## Supplementary Appendix

This appendix has been provided by the authors to give readers additional information about their work.

Supplement to: Malizia BA, Hacker MR, Penzias AS. Cumulative live-birth rates after in vitro fertilization. *N Engl J Med* 2009;360:236-43.

**Table for Web appendix.** A comparison of patients who did not and did return for subsequent IVF treatment at our center. (Results are reported as means  $\pm$  standard deviations.)

|                                  | Cycle 2             |                    | Cycle 3             |                    | Cycle 4             |                    | Cycle 5            |                    | Cycle 6            |                    |
|----------------------------------|---------------------|--------------------|---------------------|--------------------|---------------------|--------------------|--------------------|--------------------|--------------------|--------------------|
| Characteristic                   | Did not return      | Did return         | Did not return      | Did return         | Did not return      | Did return         | Did not return     | Did return         | Did not return     | Did return         |
| Age (yr)                         | 37.0 $\pm$ 5.3*     | 36.0 $\pm$ 4.6     | 37.8 $\pm$ 4.6*     | 35.9 $\pm$ 4.6     | 37.1 $\pm$ 4.6*     | 36.0 $\pm$ 4.5     | 37.0 $\pm$ 4.7*    | 36.0 $\pm$ 4.4     | 36.8 $\pm$ 4.7     | 36.0 $\pm$ 4.2     |
| BMI (kg/m <sup>2</sup> )         | 25.3 $\pm$ 5.1      | 25.2 $\pm$ 4.9     | 25.4 $\pm$ 5.0      | 25.3 $\pm$ 5.0     | 25.5 $\pm$ 5.2      | 25.4 $\pm$ 5.0     | 25.0 $\pm$ 4.6     | 25.9 $\pm$ 5.4     | 26.5 $\pm$ 5.5     | 25.9 $\pm$ 5.5     |
| Gravidity                        | 1.2 $\pm$ 1.5*      | 0.9 $\pm$ 1.3      | 1.1 $\pm$ 1.4*      | 0.9 $\pm$ 1.3      | 1.1 $\pm$ 1.4*      | 0.9 $\pm$ 1.3      | 1.0 $\pm$ 1.3      | 0.9 $\pm$ 1.3      | 1.0 $\pm$ 1.4      | 0.8 $\pm$ 1.2      |
| Parity                           | 0.5 $\pm$ 0.8*      | 0.3 $\pm$ 0.6      | 0.4 $\pm$ 0.7*      | 0.3 $\pm$ 0.6      | 0.3 $\pm$ 0.7*      | 0.3 $\pm$ 0.6      |
| CD3 FSH (mIU/L)                  | 7.8 $\pm$ 3.8*      | 7.2 $\pm$ 3.4      | 7.9 $\pm$ 3.3*      | 7.0 $\pm$ 3.5      | 7.2 $\pm$ 3.2       | 7.1 $\pm$ 3.9      | 7.7 $\pm$ 5.2*     | 6.9 $\pm$ 3.4      | 6.9 $\pm$ 2.4      | 7.0 $\pm$ 4.1      |
| Total cycle gonadotropins (IU) † | 3246<br>$\pm$ 1782* | 2846<br>$\pm$ 1542 | 3295<br>$\pm$ 1559* | 2845<br>$\pm$ 1617 | 3138<br>$\pm$ 1516* | 2911<br>$\pm$ 1752 | 3047<br>$\pm$ 1554 | 2993<br>$\pm$ 2001 | 3153<br>$\pm$ 1481 | 3067<br>$\pm$ 2404 |
| Peak estradiol (pg/mL) †         | 1128<br>$\pm$ 1063* | 1392<br>$\pm$ 1145 | 1133<br>$\pm$ 1011* | 1422<br>$\pm$ 1158 | 1248<br>$\pm$ 1066* | 1382<br>$\pm$ 1104 | 1285<br>$\pm$ 1048 | 1398<br>$\pm$ 1118 | 1286<br>$\pm$ 1007 | 1431<br>$\pm$ 1183 |
| Eggs retrieved †                 | 8.5 $\pm$ 6.1*      | 9.7 $\pm$ 6.3      | 8.4 $\pm$ 0.9*      | 9.9 $\pm$ 6.3      | 8.9 $\pm$ 5.8*      | 9.8 $\pm$ 6.4      | 9.0 $\pm$ 5.9      | 9.7 $\pm$ 6.74     | 9.1 $\pm$ 5.7      | 9.6 $\pm$ 6.7      |
| Embryos cryopreserved †          | 0.5 $\pm$ 1.8*      | 1.2 $\pm$ 2.4      | 0.9 $\pm$ 2.1*      | 1.4 $\pm$ 2.5      | 0.9 $\pm$ 2.0*      | 1.4 $\pm$ 2.5      | 1.1 $\pm$ 2.2*     | 1.4 $\pm$ 2.6      | 1.1 $\pm$ 2.2      | 1.2 $\pm$ 2.5      |
| Embryos transferred ‡            | 2.3 $\pm$ 1.3       | 2.2 $\pm$ 1.1      | 2.3 $\pm$ 1.3       | 2.2 $\pm$ 1.1      | 2.3 $\pm$ 1.2       | 2.2 $\pm$ 1.1      | 2.3 $\pm$ 1.2      | 2.2 $\pm$ 1.1      | 2.3 $\pm$ 1.2      | 2.2 $\pm$ 1.1      |

† Calculated only for fresh IVF cycles

‡ Calculated from all IVF cycles (both fresh and frozen cycles)

\*p < 0.05
